# Supplementary material
Source: Springer Nature journal article supplement (https://www.springermedizin.de/resource/supplementary/12889_2010_3153_MOESM3_ESM.pdf/9488190)
Supplement: MOESM3 [file 9488190]

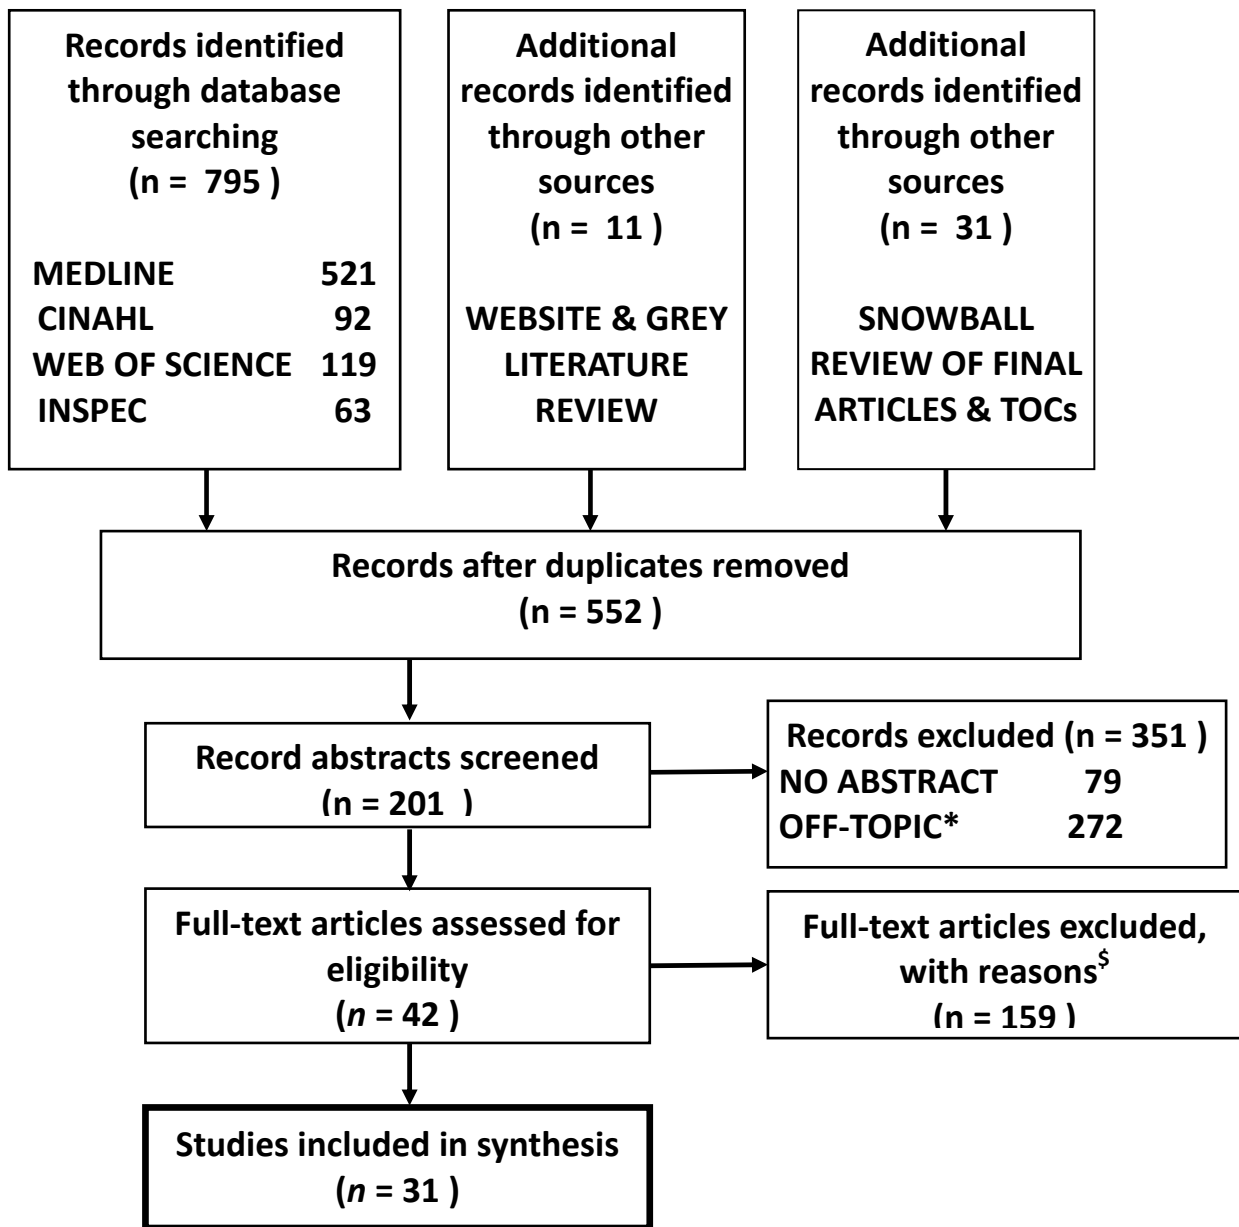

*\*Off-Topic Exclusions: training; continuing education; legal issues; editorials, letters; health worker absenteeism; surveys re: perception of preparedness; medication alerts; preventive care prompts; emergency training; EMS responder systems; communication theory*

*<sup>§</sup>Full-Text Exclusions: provider-patient communications only; no PH → provider*
